# Supplementary material for: Pangea breakup and northward drift of the Indian subcontinent reproduced by a numerical model of mantle convection
Source: PubMed Central journal article supplement (PMC4325333; doi:10.1038/srep08407), 2015-02-12
Supplement: srep08407-s1.pdf [file srep08407-s1.pdf]

Supplementary Information for

**Pangea breakup and northward drift of the Indian subcontinent reproduced by a numerical model of mantle convection**

Masaki Yoshida<sup>1</sup> & Yozo Hamano<sup>1</sup>

<sup>1</sup>Department of Deep Earth Structure and Dynamics Research, Japan Agency for Marine–Earth Science and Technology (JAMSTEC), 2-15 Natsushima-cho, Yokosuka, Kanagawa 237-0061, Japan.

Correspondence and requests for materials should be addressed to M.Y.  
(myoshida@jamstec.go.jp)

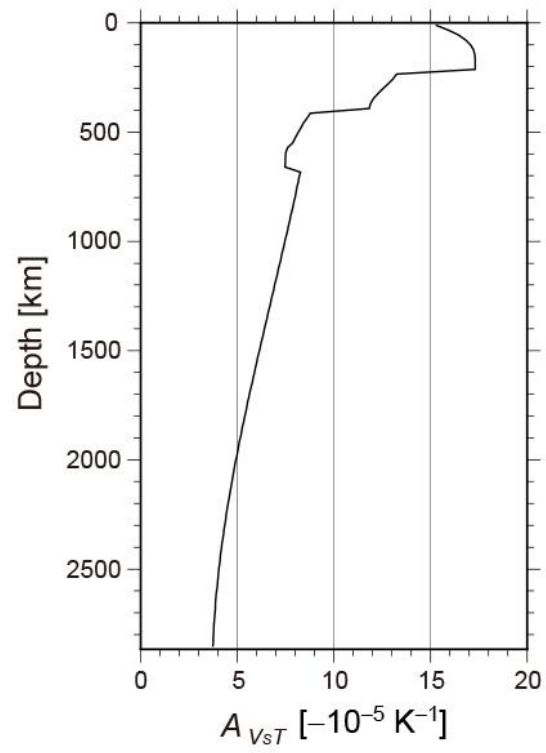

**Supplementary Figure 1.** Depth profile of the temperature derivatives of the S-wave seismic velocity anomalies,  $A_{VsT}$  (see Eq. (10) in the text).

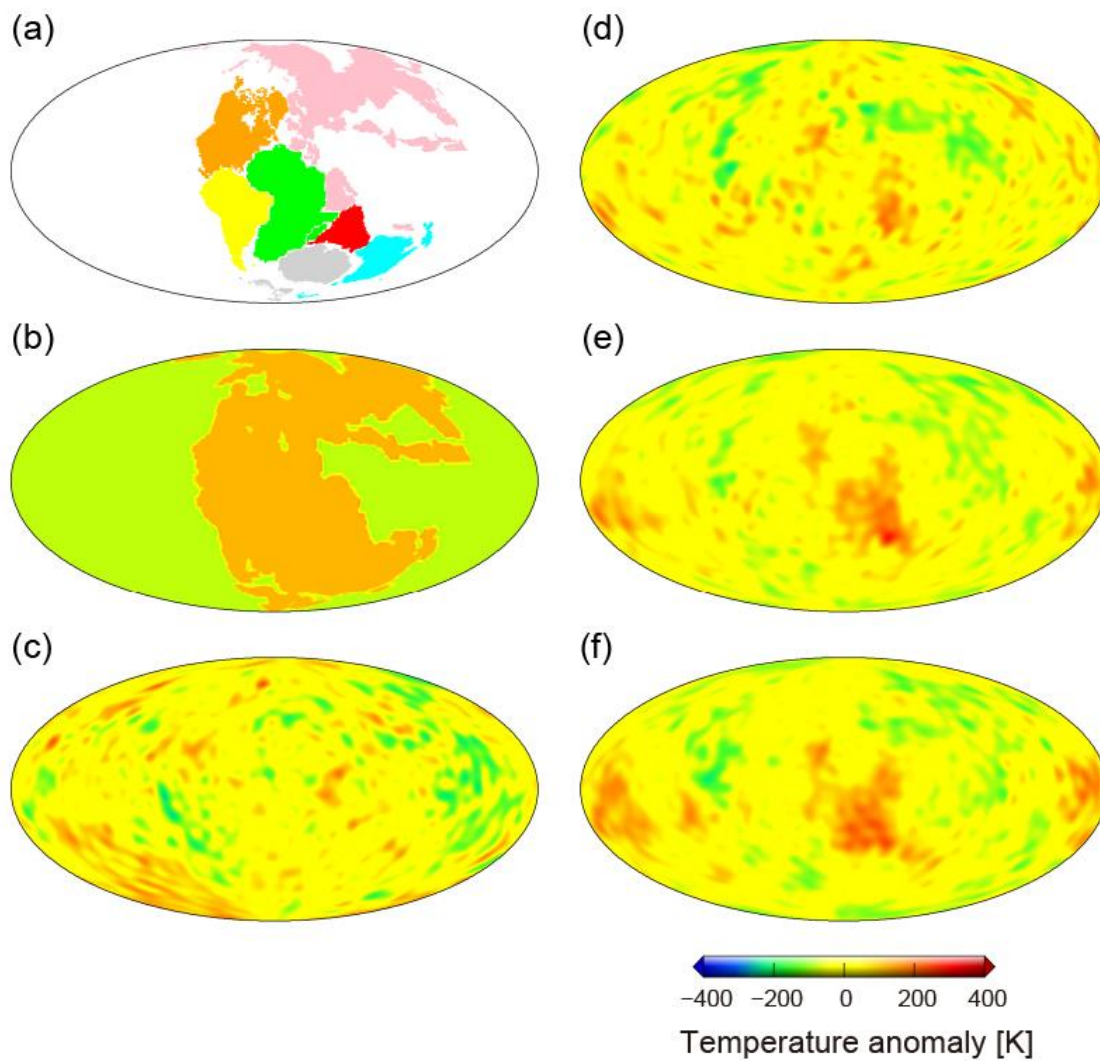

**Supplementary Figure 2.** (a) Distribution of continents at 200 Ma. (b to f) Initial state of the temperature anomaly at depths of (b) 358, (c) 717, (d) 1433, (e) 2150, and (f) 2509 km. This map was produced using the Generic Mapping Tools.

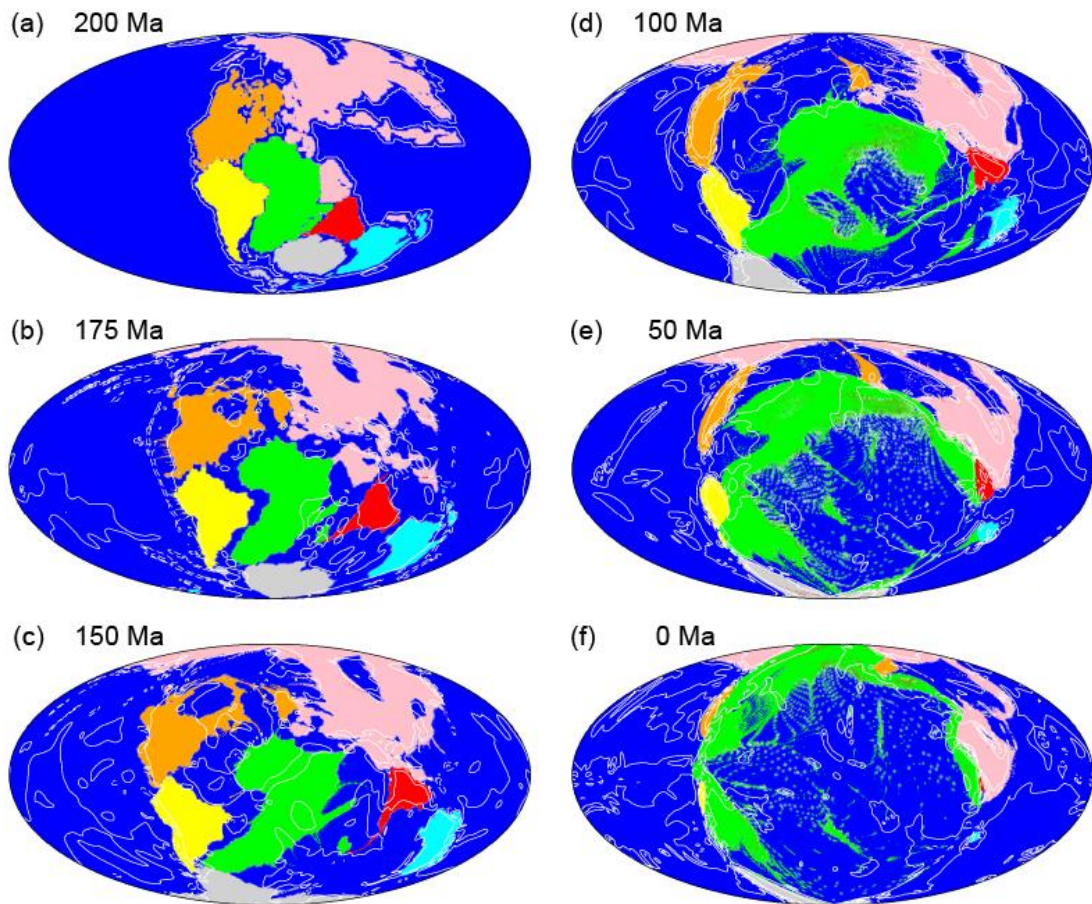

**Supplementary Figure 3.** Time sequence of the positions of drifting continents for Model C20 with the viscosity ratio of Pangea and the surrounding mantle ( $\Delta\eta_c$ ) of  $10^2$  and with the high temperature anomaly beneath Pangea. The Indian subcontinent is indicated in red. White contour lines show the temperature anomaly (i.e., the deviation from the horizontally averaged temperature) of the upper mantle at a depth of 358 km. Contour intervals are 250 K. Solid and dashed lines represent positive and negative temperature anomalies, respectively. This map was produced using the Generic Mapping Tools.

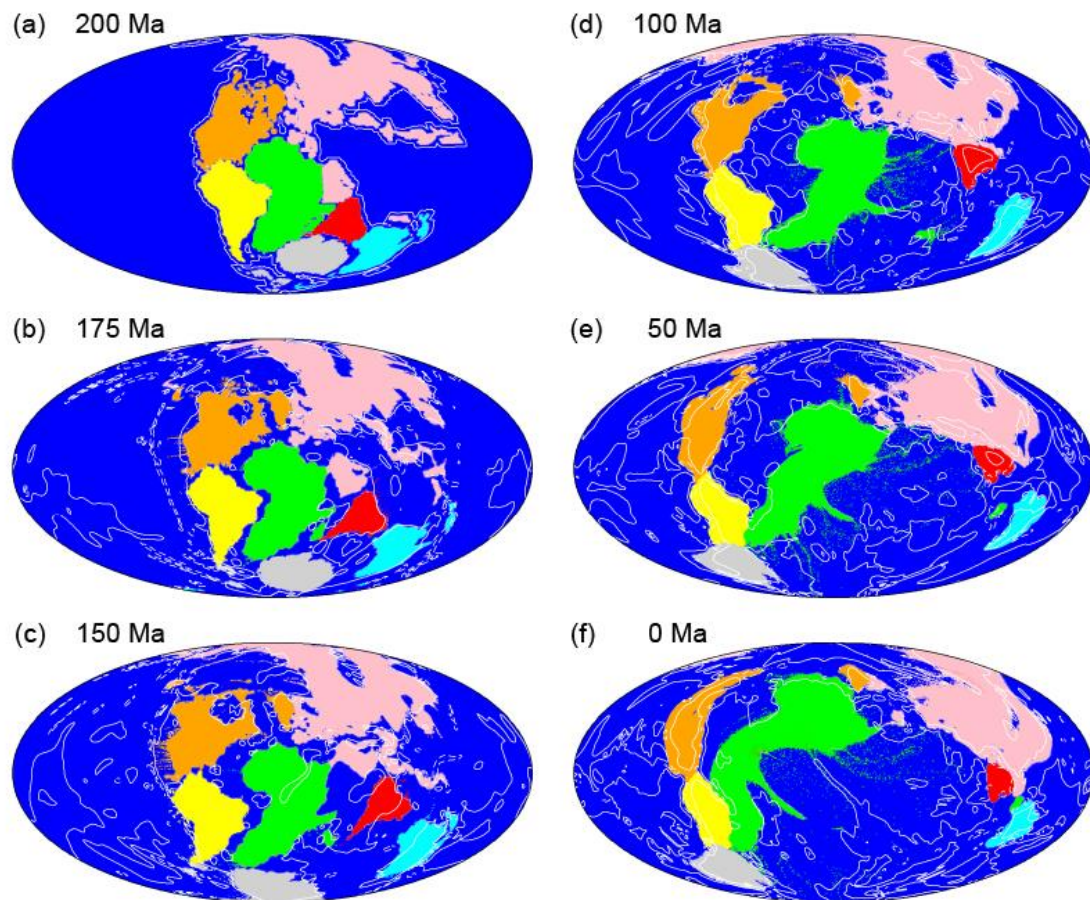

**Supplementary Figure 4.** Time sequence for Model C25 with  $\Delta\eta_C = 10^{2.5}$  (other details are as for Supplementary Fig. 3). This map was produced using the Generic Mapping Tools.

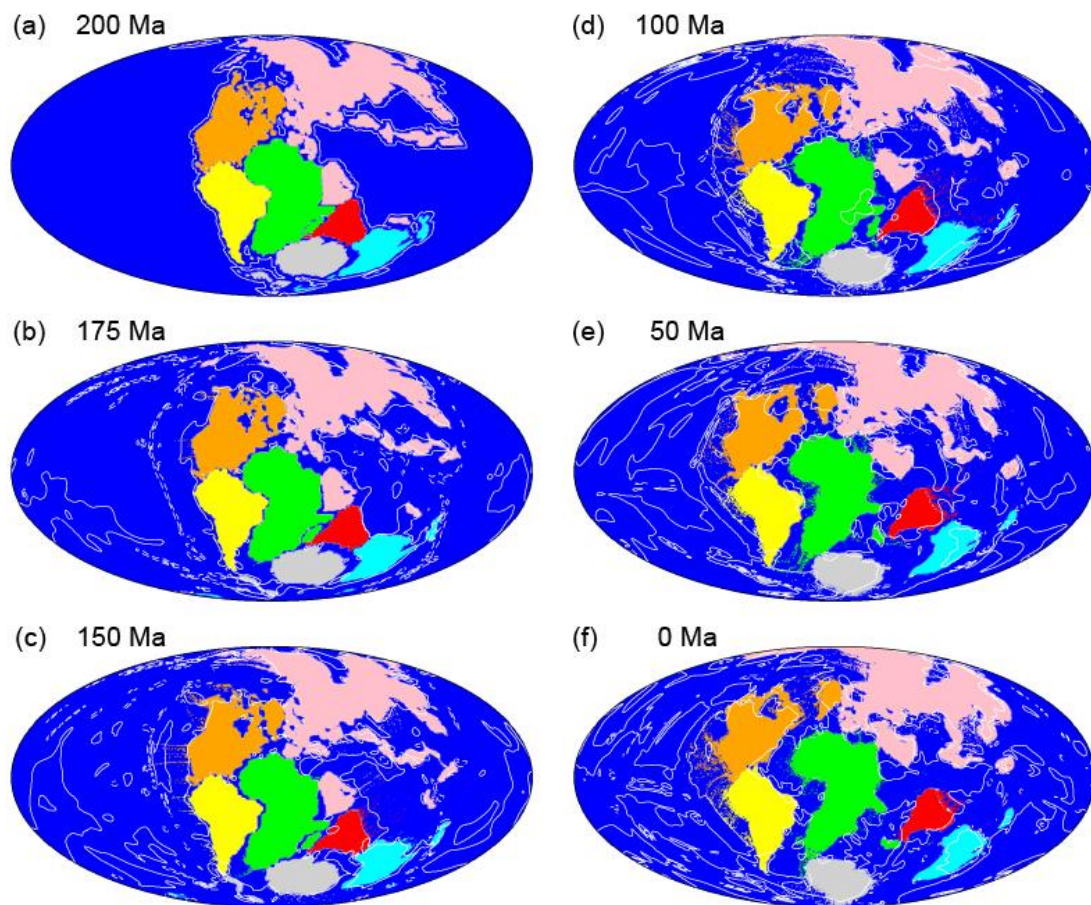

**Supplementary Figure 5.** Time sequence for Model C35 with  $\Delta\eta_C = 10^{3.5}$  (other details are as for Supplementary Fig. 3). This map was produced using the Generic Mapping Tools.

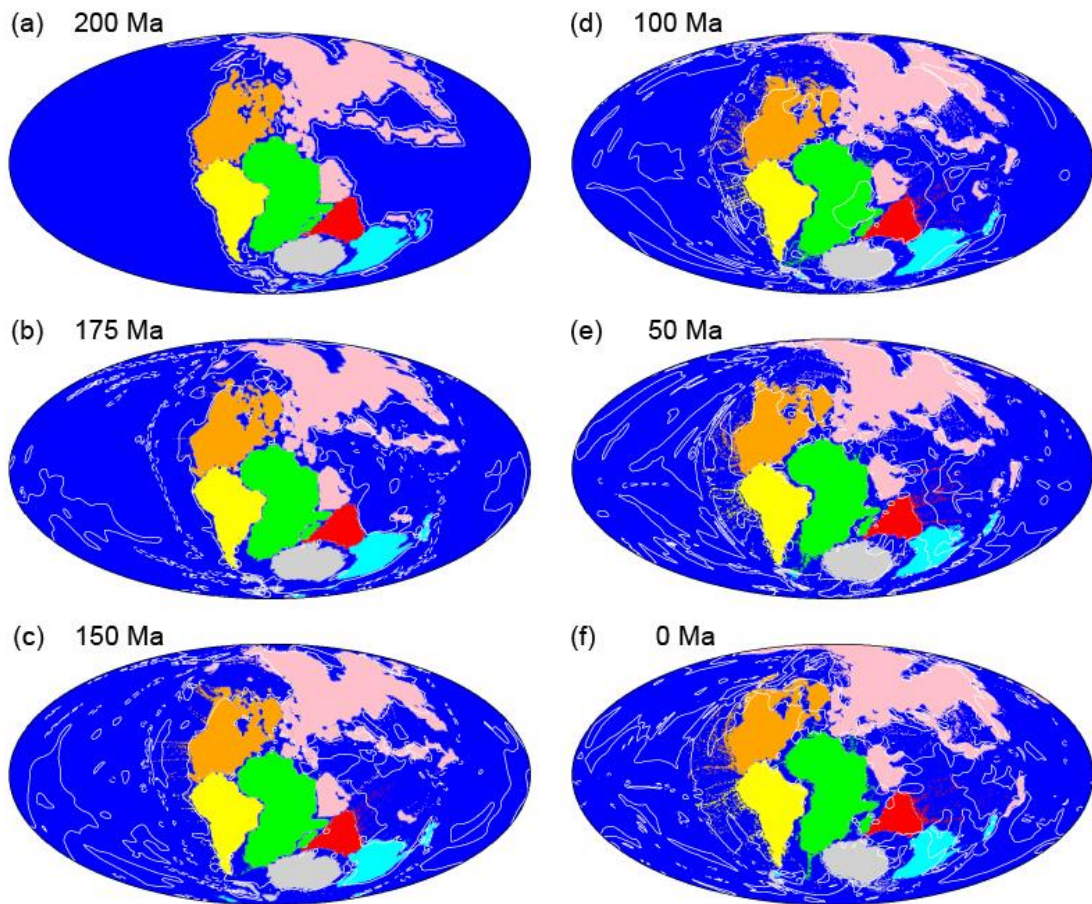

**Supplementary Figure 6.** Time sequence for Model C40 with  $\Delta\eta_C$  of  $10^4$  (other details are as for Supplementary Fig. 3). This map was produced using the Generic Mapping Tools.

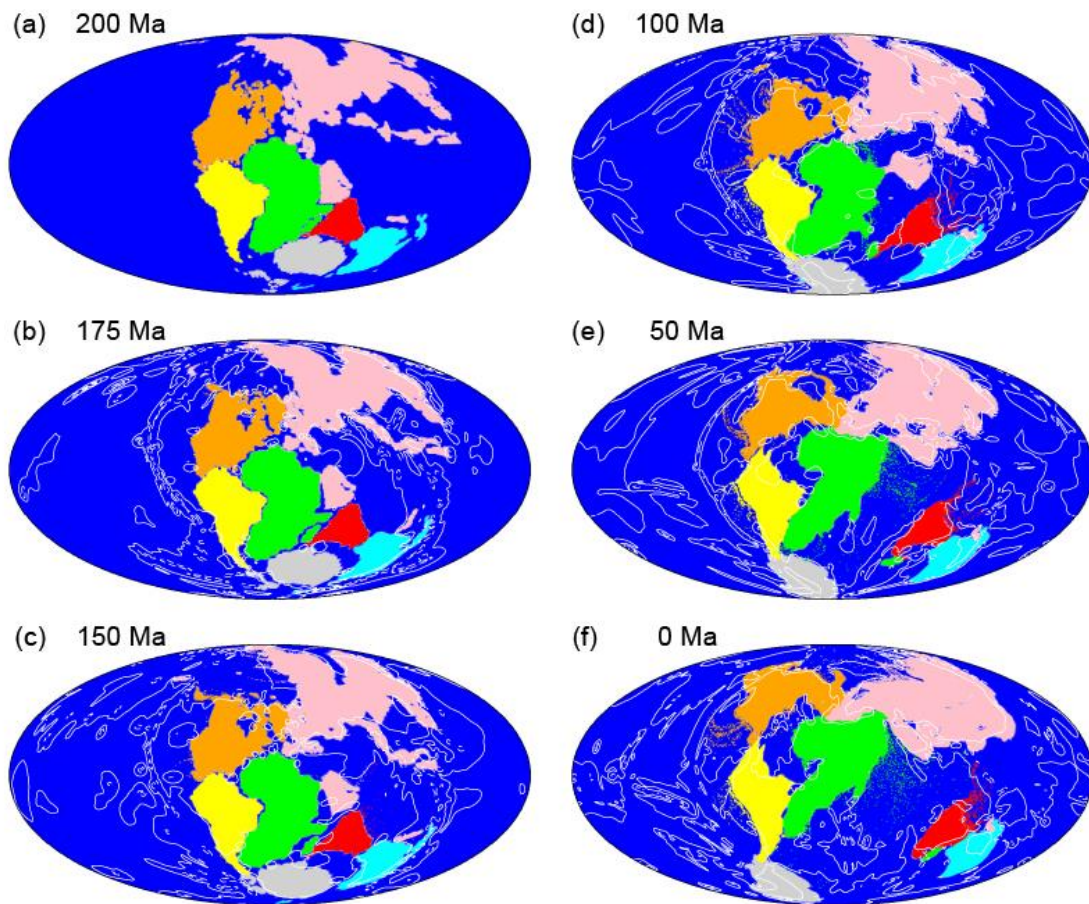

**Supplementary Figure 7.** Time sequence for Model C30H000 with  $\Delta\eta_C$  of  $10^3$  and without the high temperature anomaly beneath Pangea (other details are as for Supplementary Fig. 3). This map was produced using the Generic Mapping Tools.



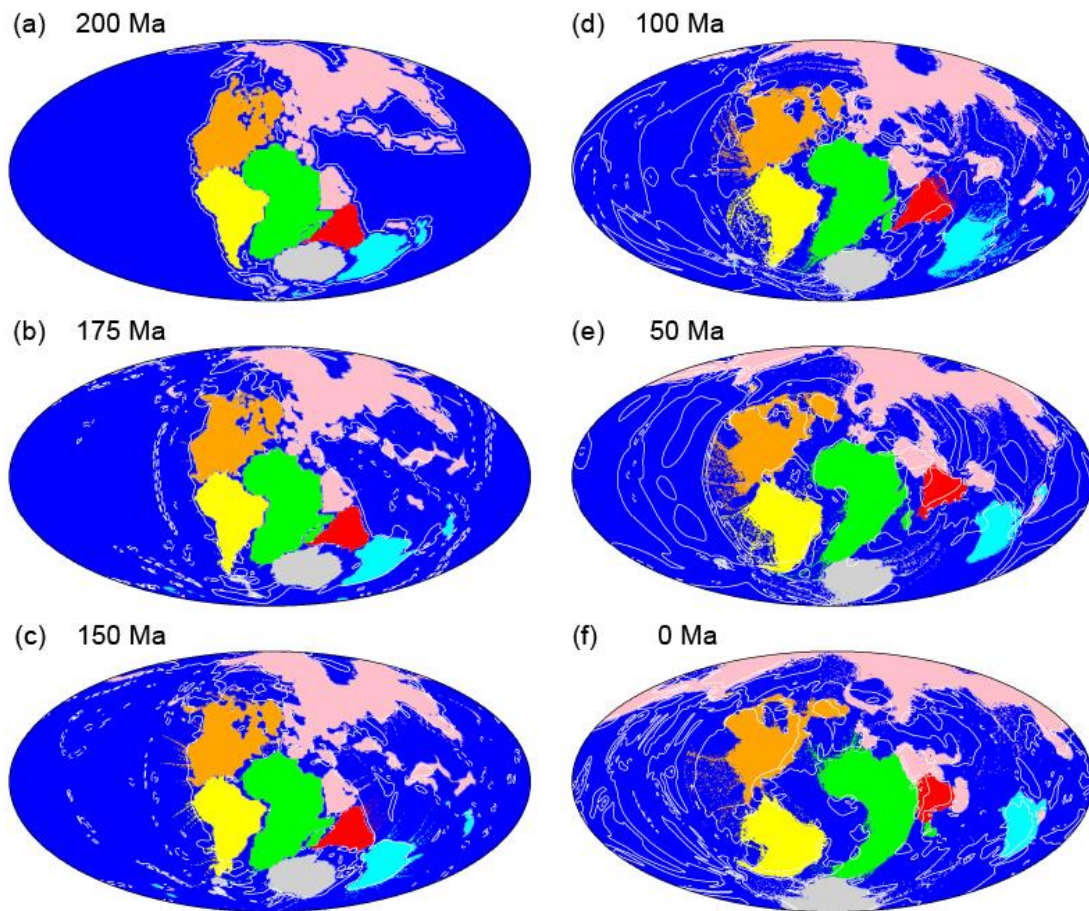

**Supplementary Figure 8.** Time sequence for Model C30NL with  $\Delta\eta_C$  of  $10^3$  and without a lateral temperature anomaly in the lower mantle (other details are as for Supplementary Fig. 3). This map was produced using the Generic Mapping Tools.

**Supplementary Table 1.** Model parameters used in the present study.

| Symbol                   | Definition                                                                                                  | Value                                                              | Unit                             |
|--------------------------|-------------------------------------------------------------------------------------------------------------|--------------------------------------------------------------------|----------------------------------|
| $g$                      | Gravitational acceleration                                                                                  | 9.81                                                               | $\text{m s}^{-2}$                |
| $\rho_0$                 | Reference density of mantle                                                                                 | 3300                                                               | $\text{kg m}^{-3}$               |
| $\alpha_0$               | Reference thermal expansivity of mantle                                                                     | $3 \times 10^{-5}$                                                 | $\text{K}^{-1}$                  |
| $T_{top}, T_{bot}$       | Temperatures at the top and bottom                                                                          | 273, 2773                                                          | K                                |
| $\Delta T$               | Temperature difference across the mantle                                                                    | 2500                                                               | K                                |
| $r_1, r_0$               | Radii of Earth and its core                                                                                 | 6371, 3504                                                         | km                               |
| $b$                      | Thickness of mantle                                                                                         | 2867                                                               | km                               |
| $\kappa_0$               | Reference thermal diffusivity of mantle                                                                     | $10^{-6}$                                                          | $\text{m}^2 \text{s}^{-1}$       |
| $\eta_0$                 | Reference viscosity of upper mantle                                                                         | $10^{21}$                                                          | Pa s                             |
| $c_{p0}$                 | Reference specific heat at constant pressure of mantle                                                      | 1250                                                               | $\text{J kg}^{-1} \text{K}^{-1}$ |
| $H$                      | Radioactive heat production rate per unit mass                                                              | Time-dependent                                                     | $\text{W kg}^{-1}$               |
| -                        | Clapeyron slope at 410-, 520-, and 660-km phase transitions                                                 | 1.6, 4.3, -2.5                                                     | $\text{MPa K}^{-1}$              |
| -                        | Density contrast at 410-, 520-, and 660-km phase transitions                                                | 7%, 3% 10%                                                         | -                                |
| $\Delta\eta_c$           | Viscosity contrast between continents ( $C_1 = 1$ ) and oceans ( $C_1 = 0$ )                                | free parameter                                                     | -                                |
| -                        | Density contrast between continents and surrounding mantle                                                  | 100                                                                | $\text{kg m}^{-3}$               |
| Dimensionless parameters |                                                                                                             |                                                                    |                                  |
| $Ra$                     | Thermal Rayleigh number                                                                                     | $5.72 \times 10^7$                                                 | -                                |
| $Ra_{ph(i)}$             | Phase Rayleigh numbers for 410-km ( $i = 1$ ), 520-km ( $i = 2$ ), and 660-km ( $i = 3$ ) phase transitions | $5.34 \times 10^7$ ,<br>$2.29 \times 10^7$ ,<br>$7.63 \times 10^7$ | -                                |
| $Ra_{ch(j)}$             | Compositional Rayleigh number for continents ( $j = 1$ )                                                    | $-2.31 \times 10^7$                                                | -                                |
| $B_j (=Ra_{ch(j)}/Ra)$   | Buoyancy ratio for continents ( $j = 1$ )                                                                   | -0.40                                                              | -                                |
| $Q$                      | Internal heating number                                                                                     | Time-dependent                                                     | -                                |
| $\zeta$                  | Mantle/shell radius ratio                                                                                   | 0.45                                                               | -                                |
